# Supplementary material for: Exposure to a SARS-CoV-2 infection at work: development of an international job exposure matrix (COVID-19-JEM)
Source: PubMed Central journal article supplement (PMC8729167; doi:10.5271/sjweh.3998), 2021-12-30
Supplement: SJWEH-48-61-S002.pdf [file SJWEH-48-61-S002.pdf]

# Exposure to a SARS-CoV-2 infection at work: development of an international job exposure matrix (COVID-19-JEM) <sup>1</sup>

by Karen M Oude Hengel, PhD, <sup>2</sup> Alex Burdorf, PhD, Anjoeka Pronk, PhD, Vivi Schlünssen, PhD, Zara A Stokholm, PhD, Henrik A Kolstad, PhD, Karin van Veldhoven, PhD, Ioannis Basinas, PhD, Martie van Tongeren,, Susan Peters, PhD

1. *Supplementary tables*
2. *Correspondence to: Karen Oude Hengel, PhD, TNO, Department of Work Health Technology, Postbus 3005, 2301 DA Leiden, The Netherlands. [E-mail: karen.oudehengel@tno.nl]*

Table S2.1 The proportion of job titles per risk category for all eight dimensions for Denmark, the Netherlands and the United Kingdom

| Dimensions              | Denmark |          |               |           | The Netherlands |          |               |           | United Kingdom |          |               |           |
|-------------------------|---------|----------|---------------|-----------|-----------------|----------|---------------|-----------|----------------|----------|---------------|-----------|
|                         | No risk | Low risk | Elevated risk | High risk | No risk         | Low risk | Elevated risk | High risk | No risk        | Low risk | Elevated risk | High risk |
| Number of people        | 15.9%   | 40.9%    | 32.7%         | 10.6%     | 22.0%           | 39.2%    | 18.3%         | 20.5%     | 14.6%          | 29.3%    | 33.5%         | 22.6%     |
| Nature of contacts      | 16.1%   | 49.0%    | 26.8%         | 8.1%      | 22.0%           | 41.9%    | 30.5%         | 5.7%      | 15.0%          | 43.5%    | 35.8%         | 5.7%      |
| Contaminated workspaces | 16.1%   | 47.4%    | 7.5%          | 29.1%     | 23.2%           | 41.7%    | 12.6%         | 22.6%     | 28.9%          | 31.1%    | 9.3%          | 30.7%     |
| Location                | 16.1%   | 4.3%     | 8.5%          | 71.1%     | 22.0%           | 11.0%    | 10.0%         | 57.1%     | 14.6%          | 9.3%     | 9.6%          | 66.5%     |
| Social distancing       | 16.1%   | 36.0%    | 28.7%         | 19.3%     | 22.0%           | 39.0%    | 24.2%         | 14.8%     | 14.6%          | 42.9%    | 32.1%         | 10.4%     |
| Face covering           | 17.7%   | 36.0%    | 39.6%         | 6.7%      | 22.0%           | 40.4%    | 36.6%         | 1.0%      | 14.6%          | 22.2%    | 61.4%         | 1.8%      |
| Income insecurity       | 78.7%   | 10.8%    | 6.9%          | 3.7%      | 77.4%           | 12.0%    | 6.1%          | 4.5%      | 52.8%          | 43.9%    | 2.8%          | 0.4%      |
| Migrant workers         | 43.7%   | 28.9%    | 15.7%         | 11.8%     | 4.9%            | 49.8%    | 36.6%         | 8.7%      | 0.8%           | 57.1%    | 40.9%         | 1.2%      |

Table S2.2 Agreements scores (95% CI), weighted kappa's (95% CI), total and variance within each country as result from step 1 (independent expert rating)

|                         | Agreement score (95% CI) <sup>1</sup> | Weighted kappa (95% CI) | Total variance | Variance of total variance (%) |       |
|-------------------------|---------------------------------------|-------------------------|----------------|--------------------------------|-------|
|                         |                                       |                         |                | Job                            | Rater |
| Denmark                 |                                       |                         |                |                                |       |
| Number                  | 0.51 (0.48- 0.54)                     | 0.55 (0.48- 0.63)       | 0.91           | 56.4                           | 43.2  |
| Nature of contacts      | 0.64 (0.62- 0.67)                     | 0.60 (0.60- 0.60)       | 0.65           | 66.2                           | 34.3  |
| Contaminated workspaces | 0.59 (0.57- 0.62)                     | 0.66 (0.62- 0.69)       | 1.20           | 60.7                           | 38.3  |
| Location                | 0.70 (0.67- 0.72)                     | 0.45 (0.30- 0.60)       | 1.31           | 45.8                           | 55.0  |
| Social distancing       | 0.55 (0.52- 0.58)                     | 0.65 (0.62- 0.69)       | 0.90           | 65.4                           | 34.6  |
| Face covering           | 0.40 (0.37- 0.42)                     | -0.08 (-0.50- 0.34)     | 0.72           | 9.2                            | 82.0  |
| The Netherlands         |                                       |                         |                |                                |       |
| Number                  | 0.53 (0.51- 0.56)                     | 0.57 (0.53- 0.61)       | 1.21           | 57.9                           | 43.6  |
| Nature of contacts      | 0.68 (0.66- 0.71)                     | 0.64 (0.62- 0.65)       | 0.79           | 64.8                           | 35.3  |
| Contaminated workspaces | 0.57 (0.54- 0.59)                     | 0.65 (0.61- 0.68)       | 1.23           | 63.6                           | 36.3  |
| Location                | 0.73 (0.71- 0.75)                     | 0.65 (0.63- 0.67)       | 1.66           | 65.1                           | 35.5  |
| Social distancing       | 0.55 (0.52- 0.58)                     | 0.64 (0.61- 0.68)       | 1.02           | 64.7                           | 35.4  |
| Face covering           | 0.39 (0.37- 0.42)                     | 0.20 (0.06- 0.33)       | 0.68           | 23.9                           | 71.4  |
| United Kingdom          |                                       |                         |                |                                |       |
| Number                  | 0.52 (0.50- 0.55)                     | 0.47 (0.41- 0.53)       | 0.94           | 48.0                           | 51.7  |
| Nature of contacts      | 0.75 (0.73- 0.77)                     | 0.67 (0.67- 0.67)       | 0.61           | 62.3                           | 39.0  |
| Contaminated workspaces | 0.58 (0.55- 0.60)                     | 0.62 (0.58- 0.65)       | 1.22           | 67.6                           | 31.3  |
| Location                | 0.74 (0.72- 0.76)                     | 0.57 (0.52- 0.61)       | 1.37           | 57.1                           | 43.7  |
| Social distancing       | 0.62 (0.65- 0.46)                     | 0.71 (0.71- 0.71)       | 0.72           | 71.0                           | 28.7  |
| Face covering           | 0.68 (0.66- 0.70)                     | 0.43 (0.21- 0.65)       | 0.60           | 43.5                           | 56.5  |

<sup>1</sup>95%CI: 95% Confidence intervals.

Table S2.3. Agreements scores (95% CI), weighted kappa's (95% CI), total and variance within each country as result from step 2 (Group expert meeting and revision)

|                         | Agreement score (95% CI) <sup>1</sup> | Weighted kappa (95% CI) | Total variance | Variance of total variance (%) |       |
|-------------------------|---------------------------------------|-------------------------|----------------|--------------------------------|-------|
|                         |                                       |                         |                | Job                            | Rater |
| Denmark                 |                                       |                         |                |                                |       |
| Number                  | 0.51 (0.49- 0.54)                     | 0.50 (0.45- 0.56)       | 0.91           | 51.4                           | 48.6  |
| Nature of contacts      | 0.60 (0.57- 0.62)                     | 0.59 (0.56- 0.62)       | 0.79           | 56.1                           | 43.9  |
| Contaminated workspaces | 0.58 (0.56- 0.61)                     | 0.55 (0.51- 0.60)       | 1.19           | 59.3                           | 40.7  |
| Location                | 0.68 (0.66- 0.70)                     | 0.45 (0.38- 0.52)       | 1.54           | 46.0                           | 54.0  |
| Social distancing       | 0.47 (0.44- 0.49)                     | 0.63 (0.59- 0.66)       | 1.07           | 62.7                           | 37.3  |
| Face covering           | 0.40 (0.38- 0.43)                     | 0.37 (0.30- 0.45)       | 0.85           | 37.4                           | 62.6  |
| The Netherlands         |                                       |                         |                |                                |       |
| Number                  | 0.52 (0.49- 0.54)                     | 0.56 (0.52- 0.60)       | 1.24           | 57.3                           | 42.7  |
| Nature of contacts      | 0.69 (0.67- 0.72)                     | 0.64 (0.64- 0.64)       | 0.77           | 64.8                           | 35.2  |
| Contaminated workspaces | 0.57 (0.54- 0.59)                     | 0.65 (0.61- 0.68)       | 1.23           | 64.5                           | 35.5  |
| Location                | 0.73 (0.71- 0.75)                     | 0.65 (0.63- 0.67)       | 1.66           | 65.1                           | 34.9  |
| Social distancing       | 0.55 (0.52- 0.58)                     | 0.64 (0.61- 0.68)       | 1.02           | 64.7                           | 35.3  |
| Face covering           | 0.56 (0.54- 0.59)                     | 0.30 (0.19- 0.40)       | 0.73           | 33.2                           | 66.8  |
| United Kingdom          |                                       |                         |                |                                |       |
| Number                  | 0.54 (0.52- 0.57)                     | 0.55 (0.50- 0.60)       | 1.01           | 55.4                           | 44.6  |
| Nature of contacts      | 0.75 (0.73- 0.77)                     | 0.67 (0.67- 0.67)       | 0.62           | 62.1                           | 37.9  |
| Contaminated workspaces | 0.57 (0.55- 0.60)                     | 0.61 (0.58- 0.65)       | 1.21           | 67.5                           | 32.5  |
| Location                | 0.74 (0.71- 0.76)                     | 0.57 (0.52- 0.61)       | 1.37           | 57.1                           | 42.9  |
| Social distancing       | 0.62 (0.60- 0.65)                     | 0.71 (0.71- 0.71)       | 0.72           | 71.1                           | 28.9  |
| Face covering           | 0.78 (0.76- 0.80)                     | 0.54 (0.40- 0.69)       | 0.61           | 54.3                           | 45.7  |

<sup>1</sup>95%CI: 95% Confidence intervals.
